# Supplementary material
Source: Springer Nature journal article supplement (https://www.springermedizin.de/resource/supplementary/12891_2008_481_MOESM4_ESM.pdf/9511532)

## Publication bias plot

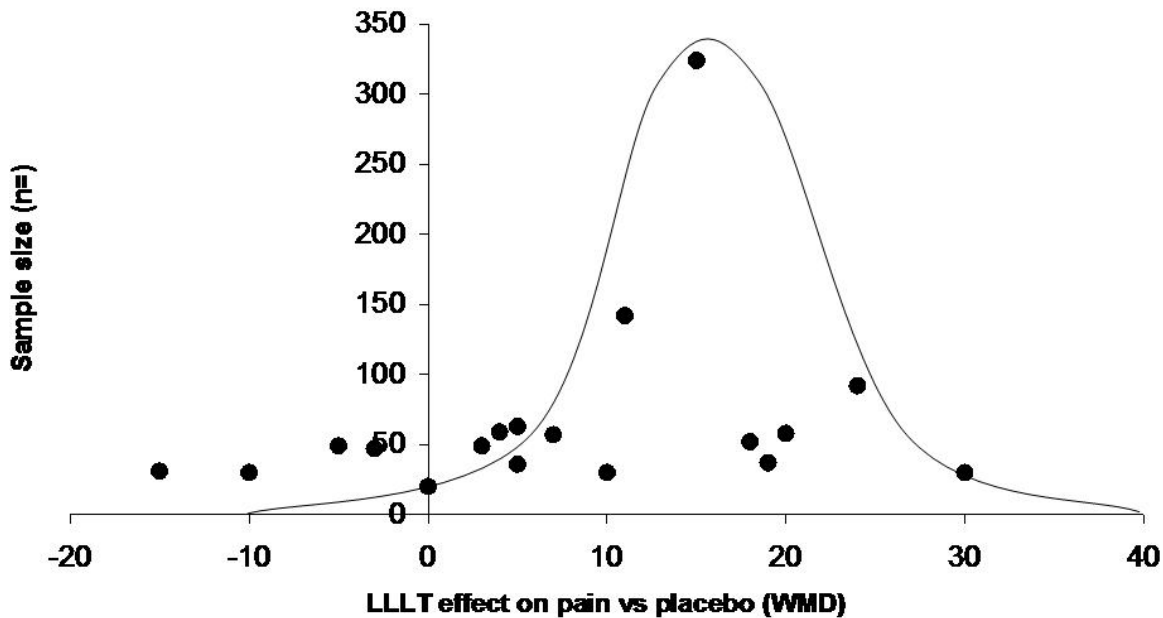

Supplement: MOESM4 [file 9511532]
